# Supplementary material for: AlGaN-based solar-blind UV heterojunction bipolar phototransistors: structural design, epitaxial growth, and optoelectric properties
Source: Royal Society of Chemistry journal article supplement (doi:10.1039/d3tc00317e), 2023-01-01
Supplement: d3tc00317e1.pdf [file d3tc00317e1.pdf]

Supporting Information

**AlGaN-based solar-blind UV heterojunction bipolar phototransistors: structural design, epitaxial growth, and optoelectric properties**

Yiren Chen,<sup>\*a</sup> Jiawang Shi,<sup>ab</sup> Zhiwei Zhang,<sup>a</sup> Guoqing Miao,<sup>a</sup> Hong Jiang,<sup>a</sup> and Hang Song<sup>\*a</sup>

<sup>a</sup> State Key Laboratory of Luminescence and Applications, Changchun Institute of Optics, Fine Mechanics and Physics, Chinese Academy of Sciences, Changchun 130033, China

<sup>b</sup> University of Chinese Academy of Sciences, Beijing 100049, China

\*corresponding emails: chenyr@ciomp.ac.cn and songh@ciomp.ac.cn

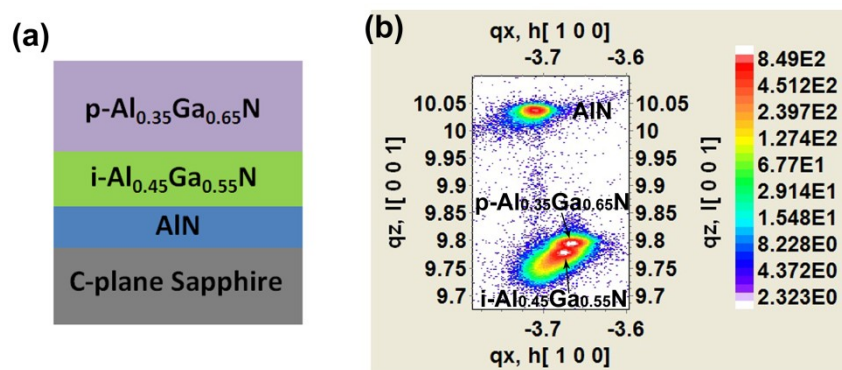

Fig. S1. (a) The epitaxial structure of p-AlGaN based on single uniform Mg doping. (b) The asymmetrical RSM around (105) reflection of the p-AlGaN material.

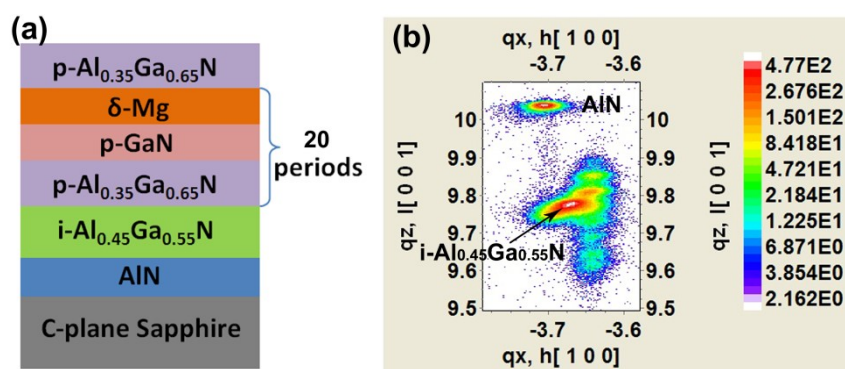

Fig. S2. (a) The epitaxial structure of p-AlGaN based on periodic uniform Mg doping and  $\delta$ -Mg doping. (b) The asymmetrical RSM around (105) reflection of the p-AlGaN material.

Table I. The electrical parameters of the two p-type doping AlGaN measured by Hall testing

| Sample | Epitaxial structure | Carrier concentration ( $\text{cm}^{-3}$ ) | Hall mobility ( $\text{cm}^2/\text{V}\cdot\text{s}$ ) |
|--------|---------------------|--------------------------------------------|-------------------------------------------------------|
|--------|---------------------|--------------------------------------------|-------------------------------------------------------|

|         |                                                    |                       |        |
|---------|----------------------------------------------------|-----------------------|--------|
| Fig. S1 | uniform Mg doping                                  | NA                    | NA     |
| Fig. S2 | periodic uniform Mg doping and $\delta$ -Mg doping | $2.16 \times 10^{18}$ | 0.4602 |

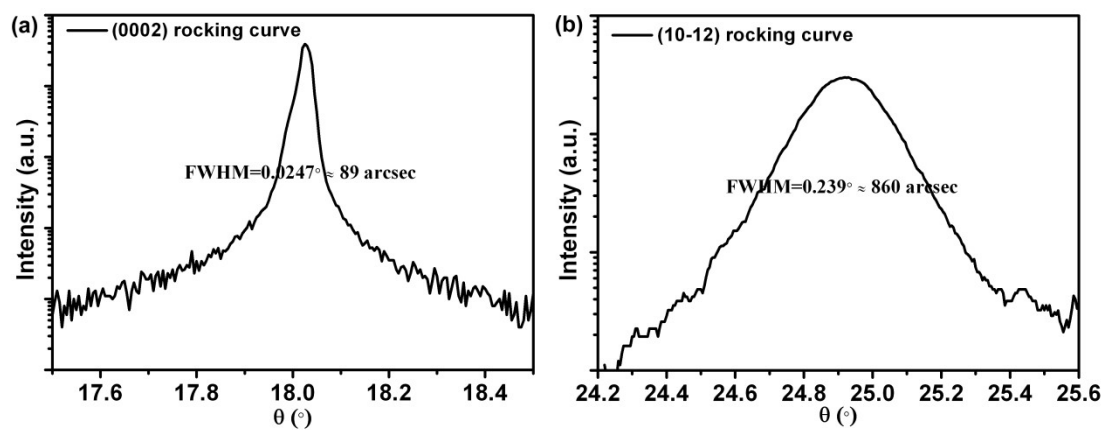

Fig. S3. (a) (0002)-plane and (b) (102)-plane rocking curves of the used AlN template.
